# Supplementary material for: Lipopolysaccharide increases the release of VEGF-C that enhances cell motility and promotes lymphangiogenesis and lymphatic metastasis through the TLR4- NF-κB/JNK pathways in colorectal cancer
Source: PubMed Central journal article supplement (PMC5342009; doi:10.18632/oncotarget.12449), 2016-10-04
Supplement: oncotarget-07-73711-s001.pdf [file oncotarget-07-73711-s001.pdf]

## Lipopolysaccharide increases the release of VEGF-C that enhances cell motility and promotes lymphangiogenesis and lymphatic metastasis through the TLR4- NF- $\kappa$ B/JNK pathways in colorectal cancer

### Supplementary Materials

**Supplementary Table S1: Standard LPS concentration (EU/ml) and absorbance ( $\lambda = 545$  nm)**

|                            |   |       |      |       |       |
|----------------------------|---|-------|------|-------|-------|
| Standard LPS concentration | 0 | 0.1   | 0.25 | 0.5   | 1     |
| Absorbance                 | 0 | 0.037 | 0.14 | 0.382 | 0.921 |

Standard curve:  $y = 1.045x + 0.060$ ,  $R^2 = 0.988$ .

**Supplementary Table S2: Normal and colorectal cancer tissue lysate measured absorbance ( $\lambda = 545$  nm) and correspondingly calculated LPS concentration**

| Absorbance (A) |       |       |       |       |       |       |       |       |       |       |
|----------------|-------|-------|-------|-------|-------|-------|-------|-------|-------|-------|
|                | 1     | 2     | 3     | 4     | 5     | 6     | 7     | 8     | 9     | 10    |
| NT             | 1.487 | 1.346 | 0.291 | 0.649 | 0.545 | 0.68  | 1.488 | 1.48  | 0.316 | 0.729 |
| CC             | 1.496 | 1.595 | 1.635 | 1.564 | 1.545 | 1.571 | 1.529 | 1.625 | 1.593 | 1.593 |
|                | 11    | 12    | 13    | 14    | 15    | 16    | 17    | 18    | 19    | 20    |
| NT             | 0.839 | 1.243 | 0.858 | 0.935 | 0.864 | 0.785 | 1.074 | 0.782 | 0.453 | 0.865 |
| CC             | 1.173 | 1.773 | 0.956 | 1.754 | 1.943 | 0.976 | 1.736 | 1.287 | 0.975 | 1.186 |

| Tissue LPS concentration (EU/ml) |       |       |       |       |       |       |       |       |       |       |
|----------------------------------|-------|-------|-------|-------|-------|-------|-------|-------|-------|-------|
|                                  | 1     | 2     | 3     | 4     | 5     | 6     | 7     | 8     | 9     | 10    |
| NT                               | 1.614 | 1.467 | 0.364 | 0.738 | 0.630 | 0.771 | 1.615 | 1.607 | 0.390 | 0.822 |
| CC                               | 1.624 | 1.727 | 1.769 | 1.695 | 1.675 | 1.702 | 1.658 | 1.758 | 1.725 | 1.725 |
|                                  | 11    | 12    | 13    | 14    | 15    | 16    | 17    | 18    | 19    | 20    |
| NT                               | 0.937 | 1.359 | 0.957 | 1.037 | 0.963 | 0.881 | 1.183 | 0.877 | 0.534 | 0.964 |
| CC                               | 1.286 | 1.913 | 1.059 | 1.893 | 2.091 | 1.080 | 1.874 | 1.405 | 1.079 | 1.300 |

EU, endotoxin unit; NT, colorectal normal tissue; CC, colorectal cancer tissue.

**Supplementary Table S3: List of oligonucleotides used in the study<sup>a</sup>**

| Oligonucleotides | Sequences (5' 3')                               | Position(nt) |
|------------------|-------------------------------------------------|--------------|
| Promoter cloning |                                                 |              |
| 2000F            | TG <u>ACTCGAGG</u> TTGAATGGAAACTCCACCT          | -2000/-1981  |
| 489F             | TG <u>ACTCGAGT</u> GCACGTGGTCCAGGGTGGT          | - 489/-470   |
| 335F             | TG <u>ACTCGAGCGG</u> GGAGGAGGCGAGGGAAA          | -335/-316    |
| 245F             | TGACTCGAGCTCCCTCGGCCGCTTTCTCT                   | -245/-226    |
| 2000-245R        | TGAAAGCTTCCCTCCCCTCCCCGAAGT                     | 17/0         |
| Real-time RT-PCR |                                                 |              |
| TLR4F            | AACTCTGGATGGGGTTTCCT                            |              |
| TLR4R            | GTGAGACCAGAAAGCTGGGA                            |              |
| VEGFR3F          | TGCACGAGGTACATGCCAAC                            |              |
| VEGFR3R          | GCTGCTCAAAGTCTCTCACGA                           |              |
| EGFCF            | ATGTTTTCTCGGATGCTGGA                            |              |
| VEGFCR           | CATTGGCTGGGGAAGAGTTTG                           |              |
| β-actinF         | CCTGGCACCCAGCACAAT                              |              |
| β-actinR         | GGGCCGGACTCGTCATACT                             |              |
| shRNA            |                                                 |              |
| shVEGFCF         | GATCCCCGTCGTTGTGTCCCTTCATATTGTTCAAGAGACAATAT    |              |
|                  | GAAGGGACACAACGACTTTTTTA                         |              |
| shVEGFCR         | AGCTTAAAAAGTCGTTGTGTCCCTTCATATTGTCTCTTGAACAATAT |              |
|                  | GAAGGGACACAACGACGGG                             |              |

nt, nucleotides; RT-PCR, reverse transcription-polymerase chain reaction; shRNA, short hairpin RNA.

<sup>a</sup>Restriction sites are underlined.

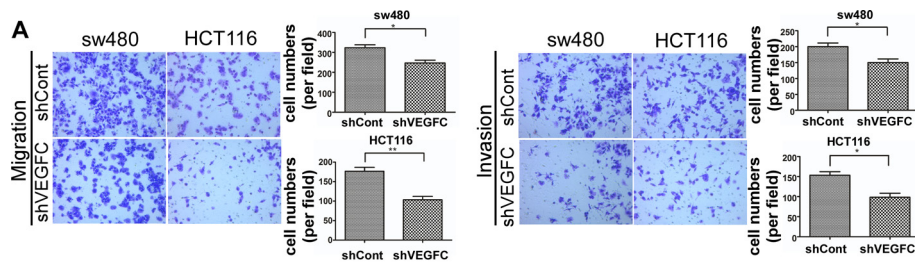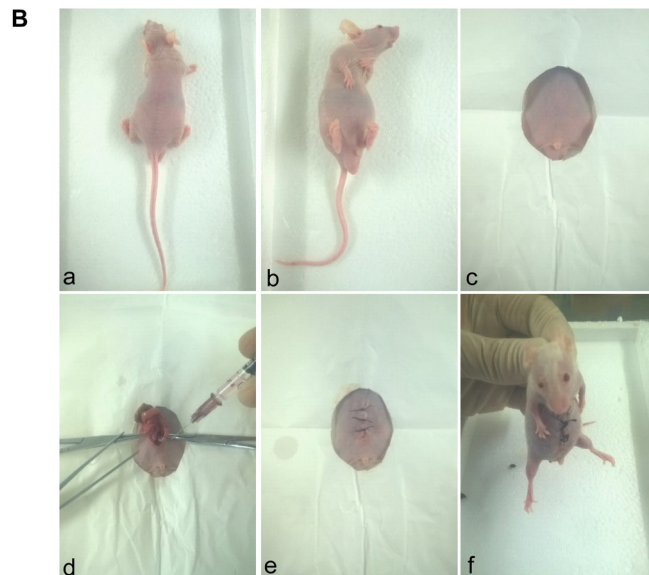

**Supplementary Figure S1:** (A) Representative images of migrated and invaded colorectal cancer cells through chambers' membrane (100 $\times$ ). Cell numbers were counted in three randomly selected microscopic fields. (B) Establishment of orthotopic xenograft model of colorectal cancer in nude mice. All mice were starved for 12 hours before model establishment.  $2 \times 10^6$  sw480 colorectal cancer cells were injected into submucosa of colorectal wall mixed with matrigel after anesthesia. Then all mice were fasting for a night after operation. Error bars represent mean  $\pm$  SEM, representative of three experiments, \* $p < \%0.05$ , \*\* $p < \%0.01$ .
